# Supplementary material for: Inflammation, physical activity, and disease-free survival in stage III colon cancer: Cancer and Leukemia Group B–Southwest Oncology Group 80702 (Alliance)
Source: PubMed Central journal article supplement — J Natl Cancer Inst. 2024 Aug 24;116(12):2032–9. doi: 10.1093/jnci/djae203 (PMC11630502; doi:10.1093/jnci/djae203), 2024-08-24
Supplement: djae203_supplementary_data.pdf [file djae203_supplementary_data.pdf]

## Supplementary Tables and Figures

### Inflammation, Physical Activity, and Disease-Free Survival in Stage III Colon Cancer: CALGB/SWOG 80702 (Alliance)

Justin C. Brown, Ph.D.<sup>1,2,3</sup>; Chao Ma, M.S.<sup>4</sup>; Qian Shi, Ph.D.<sup>5</sup>; Felix Couture, M.D.<sup>6</sup>; Philip Kuebler, M.D.<sup>7</sup>; Pankaj Kumar, M.D.<sup>8</sup>; Benjamin Tan, M.D.<sup>9</sup>; Smitha Krishnamurthi, M.D.<sup>10</sup>; Victor Chang, M.D.<sup>11</sup>; Richard M. Goldberg, M.D.<sup>12</sup>; Eileen M. O'Reilly, M.D.<sup>13</sup>; Anthony F. Shields, M.D.<sup>14</sup>; Jeffrey A. Meyerhardt, M.D., M.P.H.<sup>4</sup>

<sup>1</sup>Pennington Biomedical Research Center, Baton Rouge, LA, U.S.A.; <sup>2</sup>LSU Health Sciences Center, New Orleans School of Medicine, New Orleans, LA, U.S.A.; <sup>3</sup>Stanley S. Scott Cancer Center, Louisiana State University Health Sciences Center, New Orleans, LA, U.S.A.; <sup>4</sup>Dana-Farber Cancer Institute, Boston, MA, U.S.A.; <sup>5</sup>Alliance Statistics and Data Management Center, Mayo Clinic, Rochester, MN, U.S.A.; <sup>6</sup>Hôtel-Dieu de Québec, Québec, Canada; <sup>7</sup>Columbus NCI Community Oncology Research Program, Columbus, OH, U.S.A.; <sup>8</sup>Heartland Cancer Research NCORP, Illinois CancerCare PC, Peoria, IL, U.S.A.; <sup>9</sup>Siteman Cancer Center, Washington University School of Medicine, Saint Louis, MO, U.S.A.; <sup>10</sup>Cleveland Clinic, Cleveland, OH, U.S.A.; <sup>11</sup>Veterans Administration New Jersey Health Care System, East Orange, NJ, U.S.A.; <sup>12</sup>West Virginia University Cancer Institute, Morgantown, WV, U.S.A.; <sup>13</sup>Memorial Sloan Kettering Cancer Center, Weill Cornell Medical Center, New York, NY, U.S.A.; <sup>14</sup>Karmanos Cancer Institute, Wayne State University, MI, U.S.A.

### Corresponding Author

Justin C. Brown, Ph.D.  
6400 Perkins Road  
Baton Rouge, LA 70808  
Phone: 225-763-2715  
Email: Justin.Brown@pbrc.edu

### Short Title

Inflammation, Physical Activity, and Prognosis in Colon Cancer

**Supplementary Table 1.** Survey of recreational physical activity by type and duration

| DURING THE PAST 2 MONTHS, what was your average time PER WEEK spent at each of the following recreational activities? | TIME PER WEEK         |                       |                       |                       |                       |                       |                       |                       |                       |                       |
|-----------------------------------------------------------------------------------------------------------------------|-----------------------|-----------------------|-----------------------|-----------------------|-----------------------|-----------------------|-----------------------|-----------------------|-----------------------|-----------------------|
|                                                                                                                       | Zero                  | 1–4 Min.              | 5–19 Min.             | 20–59 Min.            | One Hour              | 1–1.5 Hrs.            | 2–3 Hrs.              | 4–6 Hrs.              | 7–10 Hrs.             | 11+ Hrs.              |
| Walking for exercise or walking to work (including golf)                                                              | <input type="radio"/> |
| Jogging (slower than 10 minutes/mile)                                                                                 | <input type="radio"/> |
| Running (10 minutes/mile or faster)                                                                                   | <input type="radio"/> |
| Bicycling (including stationary machines)                                                                             | <input type="radio"/> |
| Tennis, squash, racquetball                                                                                           | <input type="radio"/> |
| Lap swimming                                                                                                          | <input type="radio"/> |
| Other aerobic exercises (calisthenics, ski or stair machine, etc.)                                                    | <input type="radio"/> |
| Lower intensity exercise (yoga, stretching, toning)                                                                   | <input type="radio"/> |
| Other vigorous activities (e.g., lawn mowing)                                                                         | <input type="radio"/> |
| Weight training or resistance exercise (including free weights or machines such as Nautilus)                          | Arm weights           | <input type="radio"/> |
|                                                                                                                       | Leg weights           | <input type="radio"/> |

**Supplementary Table 2.** Baseline patient characteristics

| <b>Characteristic</b>                                            | <b>Randomized<br/>Sample<br/>(N = 2,524)</b> | <b>Included<br/>Sample<br/>(N = 1,179)</b> | <b>Excluded<br/>Sample<br/>(N = 1,345)</b> | <b>P</b> |
|------------------------------------------------------------------|----------------------------------------------|--------------------------------------------|--------------------------------------------|----------|
| <b>Demographic factors</b>                                       |                                              |                                            |                                            |          |
| Age, years, mean (SD)                                            | 60.9 (10.9)                                  | 60.8 (10.5)                                | 61.1 (11.2)                                | 0.61     |
| Sex, n (%)                                                       |                                              |                                            |                                            | 0.48     |
| Male                                                             | 1,390 (55.1)                                 | 658 (55.8)                                 | 732 (54.4)                                 |          |
| Female                                                           | 1,134 (44.9)                                 | 521(44.2)                                  | 613(45.6)                                  |          |
| Race, n (%)                                                      |                                              |                                            |                                            | <0.001   |
| White                                                            | 1,997 (79.1)                                 | 973 (82.5)                                 | 1,024 (76.1)                               |          |
| Black or African American                                        | 319 (12.6)                                   | 131 (11.1)                                 | 188 (14.0)                                 |          |
| Asian                                                            | 107 (4.2)                                    | 34 (2.9)                                   | 73 (5.4)                                   |          |
| All others or not reported                                       | 101 (4.0)                                    | 41 (3.5)                                   | 60 (4.5)                                   |          |
| Hispanic or Latino, n (%)                                        | 191 (7.6)                                    | 65 (5.5)                                   | 126 (9.4)                                  | <0.001   |
| <b>Clinical factors</b>                                          |                                              |                                            |                                            |          |
| Extent of invasion through<br>the bowel wall, n (%) <sup>a</sup> |                                              |                                            |                                            | 0.10     |
| T1 or T2                                                         | 448 (18.0)                                   | 230 (19.6)                                 | 218 (16.5)                                 |          |
| T3                                                               | 1,672 (67.0)                                 | 775 (66.1)                                 | 897 (67.8)                                 |          |
| T4                                                               | 375 (15.0)                                   | 167 (14.2)                                 | 208 (15.7)                                 |          |
| Missing                                                          | 29                                           | 7                                          | 22                                         |          |
| Nodal stage, n (%) <sup>b</sup>                                  |                                              |                                            |                                            | 0.57     |
| N1                                                               | 1,851 (73.3)                                 | 871 (73.9)                                 | 980 (72.9)                                 |          |
| N2                                                               | 673 (26.7)                                   | 308 (26.1)                                 | 365 (27.1)                                 |          |
| Risk group, n (%)                                                |                                              |                                            |                                            | 0.46     |
| Low (T1, T2, or T3, N1)                                          | 1,584 (63.5%)                                | 753 (64.2)                                 | 831 (62.8)                                 |          |
| High (T4, N2, or both)                                           | 911 (36.5%)                                  | 419 (35.8)                                 | 492 (37.2)                                 |          |
| Missing                                                          | 29                                           | 7                                          | 22                                         |          |
| Tumor location, n (%)                                            |                                              |                                            |                                            | 0.093    |
| Left                                                             | 1,172 (47.0)                                 | 576 (49.3)                                 | 596 (44.9)                                 |          |
| Right                                                            | 1,313 (52.6)                                 | 588 (50.3)                                 | 725 (54.6)                                 |          |
| Multiple                                                         | 11 (0.44)                                    | 5 (0.43)                                   | 6 (0.45)                                   |          |
| Missing                                                          | 28                                           | 10                                         | 18                                         |          |
| ECOG performance status, n<br>(%) <sup>c</sup>                   |                                              |                                            |                                            | 0.23     |
| 0                                                                | 1,795 (71.1)                                 | 852 (72.3)                                 | 943 (70.1)                                 |          |
| 1-2                                                              | 729 (28.9)                                   | 327 (27.7)                                 | 402 (29.9)                                 |          |
| Low dose aspirin use, n (%)                                      | 542 (21.5)                                   | 277 (23.5)                                 | 265 (19.7)                                 | 0.021    |
| <b>Randomization groups</b>                                      |                                              |                                            |                                            |          |
| Chemotherapy, n (%)                                              |                                              |                                            |                                            | 0.30     |
| 3 Months                                                         | 1,263 (50.0)                                 | 603 (51.1)                                 | 660 (49.1)                                 |          |
| 6 Months                                                         | 1,261 (50.0)                                 | 576 (48.9)                                 | 685 (50.9)                                 |          |
| Pharmacotherapy, n (%)                                           |                                              |                                            |                                            | 0.52     |
| Celecoxib                                                        | 1,263 (50.0)                                 | 598 (50.7)                                 | 665 (49.4)                                 |          |
| Placebo                                                          | 1,261 (50.0)                                 | 581 (49.3)                                 | 680 (50.6)                                 |          |

<sup>a</sup>T1 indicates tumor has grown into the submucosa; T2, growth into the muscularis propria; T3, growth through the muscularis propria and into the subserosa; T4, growth into the surface of the visceral peritoneum or into or has attached to other organs or structures.

<sup>b</sup>N1 indicates 1 to 3 lymph nodes tested positive for cancer (or for this table, N1c: tumor deposit(s) in the subserosa, mesentery, or nonperitonealized pericolic or perirectal tissues without regional lymph node metastases); N2, four or more lymph nodes tested positive for cancer.

<sup>c</sup>Performance status: 0 indicates fully active; 1, restricted in physically strenuous activity but ambulatory and able to carry out light work; and 2, ambulatory and capable of all self-care but unable to carry out any work activities, up and about more than 50% of waking hours.

**Supplementary Table 3.** Spearman correlations ( $\rho$ ) between inflammatory biomarkers

|                                   | <b>hs-CRP</b>          | <b>IL6</b>             | <b>sTNF-<math>\alpha</math>R2</b> |
|-----------------------------------|------------------------|------------------------|-----------------------------------|
| <b>hs-CRP</b>                     | $\rho=1.00$            | —                      | —                                 |
| <b>IL6</b>                        | $\rho=0.55$<br>P<0.001 | $\rho=1.00$            | —                                 |
| <b>sTNF-<math>\alpha</math>R2</b> | $\rho=0.31$<br>P<0.001 | $\rho=0.41$<br>P<0.001 | $\rho=1.00$                       |

**Supplementary Table 4.** Inflammatory biomarker tertile values

|                  | <b>hs-CRP, mg/L</b> | <b>IL6, pg/mL</b> | <b>sTNF-<math>\alpha</math>R2, pg/mL</b> |
|------------------|---------------------|-------------------|------------------------------------------|
| <b>Tertile 1</b> | $\leq 1.572$        | $\leq 2.756$      | $\leq 2519.32$                           |
| <b>Tertile 2</b> | 1.575–4.234         | 2.758–5.127       | 2520.48–3324.77                          |
| <b>Tertile 3</b> | $\geq 4.246$        | $\geq 5.143$      | $\geq 3326.6$                            |

**Supplementary Table 5.** Inflammatory biomarker values by physical activity status

|                                                              | <b>hs-CRP, mg/L</b>  | <b>IL6, pg/mL</b>    | <b>sTNF-<math>\alpha</math>R2, pg/mL</b> |
|--------------------------------------------------------------|----------------------|----------------------|------------------------------------------|
| Insufficiently Physically Active (<9 MET), Median (IQR)      | 2.99 (1.41, 6.48)    | 4.07 (2.53, 6.94)    | 3047 (2480, 3826)                        |
| Sufficiently Physically Active ( $\geq$ 9 MET), Median (IQR) | 2.16 (1.01, 4.50)    | 3.32 (2.10, 5.45)    | 2688 (2193, 3387)                        |
| Difference in medians (95% CI)                               | -0.66 (-0.96, -0.39) | -0.67 (-0.96, -0.40) | -361 (-468, -256)                        |
| P                                                            | <0.001               | <0.001               | <0.001                                   |

Difference in medians and p values were calculated by the Hodges-Lehmann location of shift, and Wilcoxon rank sum test, respectively.

**Supplementary Table 6.** Association of disease-free survival endpoint with individual inflammatory biomarkers and physical activity status

| <b>Inflammatory Burden and Physical Activity Status</b> | <b>3-y DFS Rate (95% CI)<sup>a,b</sup></b> | <b>3-y Risk Difference (95% CI)<sup>a,c</sup></b> | <b>P<sup>c</sup></b> | <b>Hazard Ratio (95% CI)<sup>a</sup></b> | <b>P</b> |
|---------------------------------------------------------|--------------------------------------------|---------------------------------------------------|----------------------|------------------------------------------|----------|
| <b>Low hs-CRP</b>                                       |                                            |                                                   |                      |                                          |          |
| Sufficient Physical Activity                            | 87.4 (82.0, 91.0)                          | 0.0–Reference                                     | —                    | 1.00–Reference                           | —        |
| Insufficient Physical Activity                          | 81.8 (74.9, 86.8)                          | –5.6 (–12.8, 1.6)                                 | 0.12                 | 1.49 (0.96, 2.32)                        | 0.08     |
| <b>Intermediate hs-CRP</b>                              |                                            |                                                   |                      |                                          |          |
| Sufficient Physical Activity                            | 82.2 (75.6, 87.1)                          | –5.2 (–12.3, 1.9)                                 | 0.15                 | 1.45 (0.93, 2.25)                        | 0.10     |
| Insufficient Physical Activity                          | 75.7 (68.3, 81.4)                          | –11.7 (–19.1, –4.3)                               | 0.002                | 2.07 (1.38, 3.10)                        | <0.001   |
| <b>High hs-CRP</b>                                      |                                            |                                                   |                      |                                          |          |
| Sufficient Physical Activity                            | 86.5 (79.9, 90.7)                          | –0.9 (–8.1, 6.3)                                  | 0.80                 | 1.07 (0.65, 1.76)                        | 0.79     |
| Insufficient Physical Activity                          | 76.8 (70.0, 82.5)                          | –10.6 (–17.5, –3.7)                               | 0.004                | 1.95 (1.30, 2.93)                        | 0.001    |
| <b>Low IL6</b>                                          |                                            |                                                   |                      |                                          |          |
| Sufficient Physical Activity                            | 87.9 (82.4, 91.5)                          | 0.0–Reference                                     | —                    | 1.00–Reference                           | —        |
| Insufficient Physical Activity                          | 80.1 (73.0, 85.5)                          | –7.8 (–15.1, –0.5)                                | 0.034                | 1.71 (1.10, 2.68)                        | 0.020    |
| <b>Intermediate IL6</b>                                 |                                            |                                                   |                      |                                          |          |
| Sufficient Physical Activity                            | 86.1 (80.2, 90.3)                          | –1.8 (–8.5, 4.9)                                  | 0.60                 | 1.16 (0.72, 1.86)                        | 0.55     |
| Insufficient Physical Activity                          | 77.4 (70.2, 82.9)                          | –10.5 (–17.7, –3.3)                               | 0.005                | 1.99 (1.30, 3.04)                        | 0.002    |
| <b>High IL6</b>                                         |                                            |                                                   |                      |                                          |          |
| Sufficient Physical Activity                            | 81.7 (74.3, 86.5)                          | –6.2 (–13.8, 1.4)                                 | 0.10                 | 1.57 (0.99, 2.49)                        | 0.060    |
| Insufficient Physical Activity                          | 77.0 (70.3, 82.5)                          | –10.9 (–17.8, –4.0)                               | 0.003                | 2.03 (1.34, 3.06)                        | <0.001   |
| <b>Low sTNF-<math>\alpha</math>2,</b>                   |                                            |                                                   |                      |                                          |          |
| Sufficient Physical Activity                            | 85.9 (80.1, 90.0)                          | 0.0–Reference                                     | —                    | 1.00–Reference                           | —        |
| Insufficient Physical Activity                          | 80.1 (72.6, 85.6)                          | –5.8 (–13.4, 1.8)                                 | 0.12                 | 1.47 (0.95, 2.26)                        | 0.08     |
| <b>Intermediate sTNF-<math>\alpha</math>2,</b>          |                                            |                                                   |                      |                                          |          |
| Sufficient Physical Activity                            | 85.7 (79.4, 90.0)                          | –0.2 (–7.1, 6.7)                                  | 0.95                 | 1.02 (0.64, 1.62)                        | 0.93     |
| Insufficient Physical Activity                          | 78.7 (71.9, 83.8)                          | –7.2 (–14.3, –0.1)                                | 0.046                | 1.58 (1.06, 2.37)                        | 0.030    |
| <b>High sTNF-<math>\alpha</math>2,</b>                  |                                            |                                                   |                      |                                          |          |
| Sufficient Physical Activity                            | 84.6 (78.0, 88.9)                          | –1.3 (–8.8, 6.2)                                  | 0.73                 | 1.11 (0.70, 1.74)                        | 0.66     |
| Insufficient Physical Activity                          | 76.0 (69.2, 81.7)                          | –9.9 (–16.9, –2.9)                                | 0.006                | 1.81 (1.23, 2.67)                        | 0.002    |

Abbreviations: DFS, disease-free survival; CI, confidence interval; y, year.

<sup>a</sup>Adjusted for sex, extent of invasion through the bowel wall, nodal stage, prudent dietary pattern (time-varying), chemotherapy randomization, and pharmacotherapy randomization. Continuous covariates were modeled linearly, and categorical covariates were modeled using the categories presented in Table 1.

<sup>b</sup>Covariates for predicting disease-free survival rates were set to the mean of the study population for continuous variables and most common category for categorical variables.

<sup>c</sup>95% confidence intervals and p values were calculated via test of proportions.



**Supplementary Table 7.** Association of overall survival endpoint with individual inflammatory biomarkers and physical activity status

| <b>Inflammatory Burden and Physical Activity Status</b> | <b>5-y OS Rate (95% CI)<sup>a,b</sup></b> | <b>5-y Risk Difference (95% CI)<sup>a,c</sup></b> | <b>P<sup>c</sup></b> | <b>Hazard Ratio (95% CI)<sup>a</sup></b> | <b>P</b> |
|---------------------------------------------------------|-------------------------------------------|---------------------------------------------------|----------------------|------------------------------------------|----------|
| <b>Low hs-CRP</b>                                       |                                           |                                                   |                      |                                          |          |
| Sufficient Physical Activity                            | 93.4 (89.2, 95.9)                         | 0.0–Reference                                     | —                    | 1.00–Reference                           | —        |
| Insufficient Physical Activity                          | 89.7 (84.2, 93.4)                         | –3.7 (–9.2, 1.8)                                  | 0.19                 | 1.60 (0.88, 2.88)                        | 0.12     |
| <b>Intermediate hs-CRP</b>                              |                                           |                                                   |                      |                                          |          |
| Sufficient Physical Activity                            | 89.6 (84.3, 93.2)                         | –3.8 (–9.3, 1.7)                                  | 0.18                 | 1.61 (0.90, 2.91)                        | 0.11     |
| Insufficient Physical Activity                          | 85.1 (78.3, 90.1)                         | –8.3 (–14.2, –2.4)                                | 0.006                | 2.38 (1.38, 4.08)                        | 0.002    |
| <b>High hs-CRP</b>                                      |                                           |                                                   |                      |                                          |          |
| Sufficient Physical Activity                            | 92.4 (86.7, 95.4)                         | –1.0 (–6.5, 4.5)                                  | 0.72                 | 1.17 (0.60, 2.28)                        | 0.64     |
| Insufficient Physical Activity                          | 86.4 (80.6, 90.9)                         | –7.0 (–12.4, –1.6)                                | 0.015                | 2.16 (1.26, 3.70)                        | 0.005    |
| <b>Low IL6</b>                                          |                                           |                                                   |                      |                                          |          |
| Sufficient Physical Activity                            | 93.9 (89.6, 96.4)                         | 0.0–Reference                                     | —                    | 1.00–Reference                           | —        |
| Insufficient Physical Activity                          | 87.3 (81.0, 91.7)                         | –6.6 (–12.4, –0.8)                                | 0.024                | 2.17 (1.19, 3.96)                        | 0.012    |
| <b>Intermediate IL6</b>                                 |                                           |                                                   |                      |                                          |          |
| Sufficient Physical Activity                            | 92.3 (87.8, 95.1)                         | –1.6 (–6.7, 3.5)                                  | 0.53                 | 1.28 (0.66, 2.47)                        | 0.46     |
| Insufficient Physical Activity                          | 84.9 (78.1, 89.9)                         | –9.0 (–14.8, –3.2)                                | 0.003                | 2.61 (1.47, 4.64)                        | 0.001    |
| <b>High IL6</b>                                         |                                           |                                                   |                      |                                          |          |
| Sufficient Physical Activity                            | 89.4 (83.0, 93.2)                         | –4.5 (–10.4, 1.4)                                 | 0.12                 | 1.79 (0.95, 3.36)                        | 0.07     |
| Insufficient Physical Activity                          | 88.7 (83.5, 92.6)                         | –5.2 (–10.3, 0.0)                                 | 0.053                | 1.91 (1.07, 3.41)                        | 0.03     |
| <b>Low sTNF-<math>\alpha</math>2,</b>                   |                                           |                                                   |                      |                                          |          |
| Sufficient Physical Activity                            | 93.2 (88.5, 95.8)                         | 0.0–Reference                                     | —                    | 1.00–Reference                           | —        |
| Insufficient Physical Activity                          | 88.2 (81.8, 92.6)                         | –5.0 (–10.9, 0.9)                                 | 0.09                 | 1.78 (0.97, 3.26)                        | 0.06     |
| <b>Intermediate sTNF-<math>\alpha</math>2,</b>          |                                           |                                                   |                      |                                          |          |
| Sufficient Physical Activity                            | 91.8 (86.9, 94.9)                         | –1.4 (–6.7, 3.9)                                  | 0.60                 | 1.21 (0.63, 2.32)                        | 0.56     |
| Insufficient Physical Activity                          | 87.8 (81.9, 91.9)                         | –5.4 (–10.8, 0.1)                                 | 0.052                | 1.84 (1.03, 3.29)                        | 0.04     |
| <b>High sTNF-<math>\alpha</math>2,</b>                  |                                           |                                                   |                      |                                          |          |
| Sufficient Physical Activity                            | 90.8 (85.3, 94.1)                         | –2.4 (–8.2, 3.4)                                  | 0.40                 | 1.37 (0.73, 2.58)                        | 0.32     |
| Insufficient Physical Activity                          | 85.7 (79.7, 90.3)                         | –7.5 (–12.9, –2.1)                                | 0.008                | 2.18 (1.24, 3.82)                        | 0.006    |

Abbreviations: DFS, disease-free survival; CI, confidence interval; y, year.

<sup>a</sup>Adjusted for sex, extent of invasion through the bowel wall, nodal stage, prudent dietary pattern (time-varying), chemotherapy randomization, and pharmacotherapy randomization. Continuous covariates were modeled linearly, and categorical covariates were modeled using the categories presented in Table 1.

<sup>b</sup>Covariates for predicting disease-free survival rates were set to the mean of the study population for continuous variables and most common category for categorical variables.

<sup>c</sup>95% confidence intervals and p values were calculated via test of proportions.

### Supplementary Figure 1. CONSORT Flow Diagram

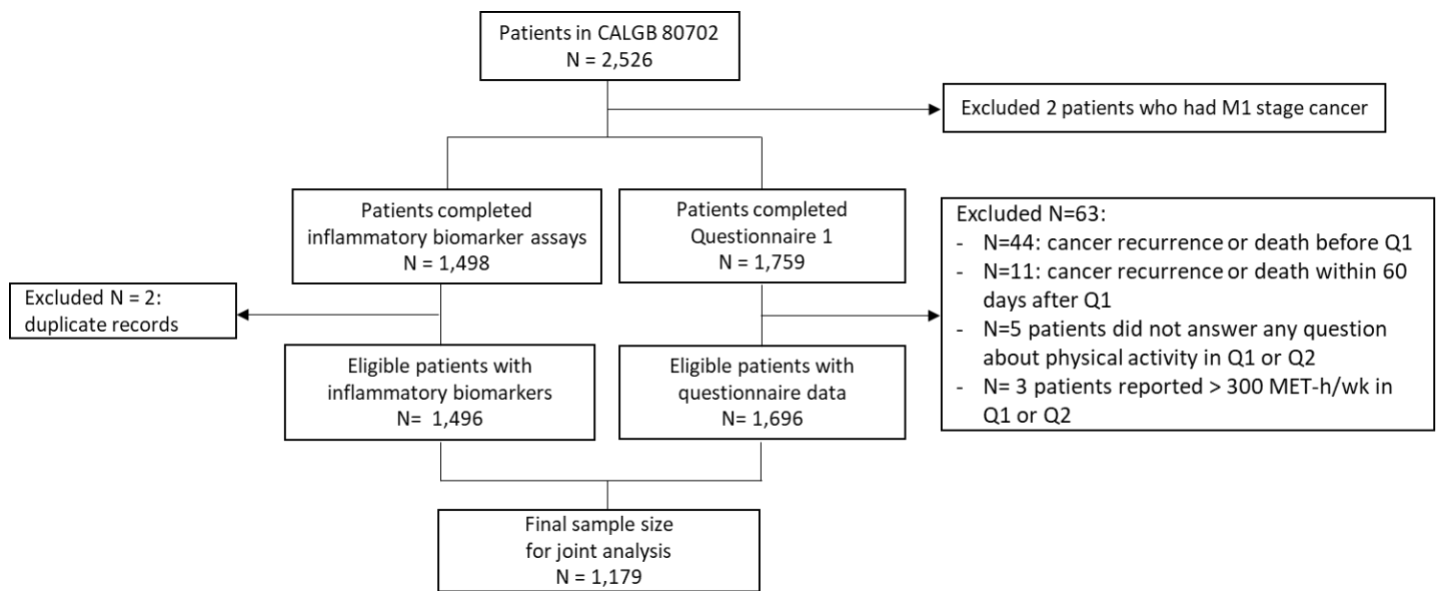

Q1, physical activity questionnaire 1; Q2, physical activity questionnaire two
